# Supplementary material for: A Genome-Wide Screen in Yeast Identifies Specific Oxidative Stress Genes Required for the Maintenance of Sub-Cellular Redox Homeostasis
Source: PLoS One. 2012 Sep 6;7(9):e44278. doi: 10.1371/journal.pone.0044278 (PMC3435413; doi:10.1371/journal.pone.0044278)
Supplement: Dataset S1 — Non-essential mutants identified as having a significantly more oxidized cytosol than wild type. (XLS) [file pone.0044278.s004.xls]

## Sheet: Sheet1
Systematic Name	Common Name	Function	Mutant EGSH ±SD (-mV)
	Wild type	-	349±3
YPL091W	glr1	Cytosolic and mitochondrial glutathione oxidoreductase	275 ±4
YML007W	yap1	Basic leucine zipper (bZIP) transcription factor required for oxidative stress tolerance;	319±4
YHR206W	skn7	Oxidative stress responsive transcription factor	320±5
YHR043C	dog2	2-deoxyglucose-6-phosphate phosphatase	325±4
YPL049C	dig1	MAP kinase-responsive inhibitor of the Ste12p transcription factor	327±6
YKL121W	dgr2	Protein of unknown function	330±45
YDR403W	dit1	Sporulation-specific enzyme required for spore wall maturation, I	330±3
YPR074C	tkl1	Transketolase, similar to Tkl2p; catalyses conversion of xylulose-5-phosphate and ribose-5-phosphate to sedoheptulose-7-phosphate and glyceraldehyde-3-phosphate in the pentose phosphate pathway	330±4
YDR315C	ipk1	Inositol 1,3,4,5,6-pentakisphosphate 2-kinase	332±3
YHR155W	ysp1	Mitochondrial protein with a potential role in promoting mitochondrial fragmentation during programmed cell death	332±4
YHR195W	nvj1	Nuclear envelope protein, anchored to the nuclear inner membrane	332±3
YGR034W	rpl26B	Protein component of the large (60S) ribosomal subunit	332±6
YMR163C	inp2	Peroxisome-specific receptor important for peroxisome inheritance	332±6
YKL094W	yju3	Monoglyceride lipase	332±5
YLL039C	ubi4	Ubiquitin, becomes conjugated to proteins, marking them for selective degradation via the ubiquitin-26S proteasome system; essential for the cellular stress response	332±4
YIL119C	rpi1	Putative transcriptional regulator	332±4
YIL162W	suc2	Invertase, sucrose hydrolysing enzyme	333±3
YDR058C	tgl2	Triacylglycerol lipase	333±3
YIL131C	fkh1	Forkhead family transcription factor	333±4
YOR179C	syc1	Subunit of the APT subcomplex of cleavage and polyadenylation factor	333±3
YPR040W	tip41	Component of the TOR (target of rapamycin) signalling pathway	333±6
YPR044C	opi11	Dubious open reading frame unlikely to encode a protein	333±4
YMR145C	nde1	Mitochondrial external NADH dehydrogenase, a type II NAD(P)H:quinone oxidoreductase that catalyses the oxidation of cytosolic NADH; Nde1p and Nde2p provide cytosolic NADH to the mitochondrial respiratory chain	333±4
YPL147W	pxa1	Subunit of a heterodimeric peroxisomal ATP-binding cassette transporter complex (Pxa1p-Pxa2p)	333±5
YDR406W	pdr15	Plasma membrane ATP binding cassette (ABC) transporter, multidrug transporter and general stress response factor	333±5
YDR409W	siz1	SUMO/Smt3 ligase	333±4
YGR076C	mrpl25	Mitochondrial ribosomal protein of the large subunit	333±4
YPL013C	mprs16	Mitochondrial ribosomal protein of the small subunit	333±3
YPL069C	bts1	Geranylgeranyl diphosphate synthase	333±3
YNR018W	aim38	Putative protein of unknown function	333±4
YGR037C	acb1	Acyl-CoA-binding protein	333±3
YDR322W	mrpl35	Mitochondrial ribosomal protein of the large subunit	333±4
YMR193W	mrpl24	Mitochondrial ribosomal protein of the large subunit	333±7
YDR276C	pmp3	Small plasma membrane protein	333±5
YDR291W	hrq1	Putative RecQ helicase	334±4
YDR312W	ssf2	Protein required for ribosomal large subunit maturation	334±4
YER078C	icp55	Mitochondrial aminopeptidase	334±3
YHR017W	ysc83	Non-essential mitochondrial protein of unknown function	334±5
YHR181W	svp26	Integral membrane protein of the early Golgi apparatus and endoplasmic reticulum	334±3
YKR061W	ktr2	Mannosyltransferase	334±4
YMR175W	sip18	Phospholipid-binding hydrophilin; expression is induced by osmotic stress	334±3
YJR147W	hms2	Protein with similarity to heat shock transcription factors	334±3
YHR121W	lsm12	Protein of unknown function	334±6
YPL130W	spo19	Meiosis-specific prospore protein	334±5
YPL213W	lea1	Component of U2 snRNP	334±5
YDR414C	erd1	Predicted membrane protein required for the retention of lumenal endoplasmic reticulum proteins	334±4
YDR419W	rad30	DNA polymerase eta	334±5
YDR283C	gcn2	Protein kinase	334±4
YDR225W	hta1	Histone H2A, core histone protein required for chromatin assembly and chromosome function	334±4
YKR076W	ecm4	Omega-class glutathione transferase	334±3
YDR346C	svf1	Protein with a potential role in cell survival pathways	335±3
YDR371W	cts2	Putative chitinase	335±3
YDR384C	ato3	Plasma membrane protein	335±5
YOL015W	irc10	Putative protein of unknown function	335±5
YOR350C	mne1	Mitochondrial matrix protein involved in splicing Group I aI5-beta intron from COX1 mRNA	335±4
YMR135C	gid8	Protein of unknown function	335±7
YJL201W	ecm25	Non-essential protein of unknown function	335±4
YMR287C	dss1	3'-5' exoribonuclease	335±3
YOR071C	nrt1	High-affinity nicotinamide riboside transporter	335±4
YOR324C	frt1	Tail-anchored ER membrane protein that is a substrate of the phosphatase calcineurin	335±6
YOR371C	gpb1	Multistep regulator of cAMP-PKA signaling	335±5
YPL106C	sse1	ATPase that is a component of the heat shock protein Hsp90 chaperone complex	335±5
YKR024C	dbp7	Putative ATP-dependent RNA helicase of the DEAD-box family involved in ribosomal biogenesis	336±3
YKR059W	tif1	Translation initiation factor eIF4A	336±3
YPL018W	ctf19	Outer kinetochore protein	336±4
YPR046W	mcm16	Protein involved in kinetochore-microtubule mediated chromosome segregation	336±5
YPR047W	msf1	Mitochondrial phenylalanyl-tRNA synthetase	336±4
YPL164C	mlh3	Protein involved in DNA mismatch repair and crossing-over during meiotic recombination	336±4
YPL186C	uip4	Protein that interacts with Ulp1p, a Ubl (ubiquitin-like protein)-specific protease for Smt3p protein conjugates	336±5
YPL184C	mrn1	RNA-binding protein proposed to be involved in translational regulation	336±6
YPL144W	poc4	Component of a heterodimeric Poc4p-Irc25p chaperone	336±6
YLR023C	izh3	Membrane protein involved in zinc ion homeostasis	336±4
YDR334W	swr1	Swi2/Snf2-related ATPase	337±3
YOR346W	rev1	Deoxycytidyl transferase	337±3
YOL008W	coq10	Coenzyme Q (ubiquinone) binding protein	337±4
YPL176C	tre1	Plasma membrane protein that binds to Bsd2p and regulates ubiquitylation and vacuolar degradation of the metal transporter Smf1p	337±6
YPL173W	mrpl40	Mitochondrial ribosomal protein of the large subunit	337±5
YMR081C	isf1	Serine-rich, hydrophilic protein with similarity to Mbr1p	337±4
YLR385C	swc7	Protein of unknown function	337±4
YMR214W	scj1	One of several homologues of bacterial chaperone DnaJ	337±5
YMR224C	mre11	Subunit of a complex with Rad50p and Xrs2p (MRX complex)	338±5
YDR268W	msw1	Mitochondrial tryptophanyl-tRNA synthetase	338±4
YJR050W	isy1	Member of NineTeen Complex (NTC)	338±3
YJR135W-A	tim8	Mitochondrial intermembrane space protein	339±3
YDR425W	snx41	Sorting nexin	339±5
YBR098W	mms4	Subunit of the structure-specific Mms4p-Mus81p endonuclease	339±4
YDR507C	gin4	Protein kinase involved in bud growth and assembly of the septin ring	339±4
YCL036W	gfd2	Protein of unknown function	339±3
YBL067C	ubp13	Putative ubiquitin carboxyl-terminal hydrolase	339±4
