# Supplementary material for: A Genome-Wide Screen in Yeast Identifies Specific Oxidative Stress Genes Required for the Maintenance of Sub-Cellular Redox Homeostasis
Source: PLoS One. 2012 Sep 6;7(9):e44278. doi: 10.1371/journal.pone.0044278 (PMC3435413; doi:10.1371/journal.pone.0044278)
Supplement: Dataset S2 — E GSH in the cytosol, mitochondrial matrix and peroxisome of cells lacking genes involved in redox homeostasis and antioxidant defence in exponential and stationary phase. (DOC) [file pone.0044278.s005.doc]

**Dataset S2: *E*GSH in the cytosol, mitochondrial matrix and peroxisome of cells lacking genes involved in redox homeostasis and antioxidant defence in exponential and stationary phase.** Each mutant was separately transformed with the compartmental specific roGFP2 constructs. Transformed cells were grown to exponential phase (A600 = ~0.5) and stationary phase (A600 = 5-6) and *E*GSH estimated by flow cytometry analysis as described in the Materials and Methods. 10,000 cells were analyzed and data are the mean of triplicates  standard deviation. EGSH values that were significantly different to wild-type are indicated in red bold font.

|  |  |  | **CYTOSOL** | |  | **MITOCHONDRIAL MATRIX** | |  | **PEROXISOME** | |  |
| --- | --- | --- | --- | --- | --- | --- | --- | --- | --- | --- | --- |
| **Functional Group** |  | **Description** | **Exponential Phase**  ***E*GSH  SD**  **(-mV)** | **Stationary Phase**  ***E*GSH  SD**  **(-mV)** | | **Exponential Phase**  ***E*GSH  SD**  **(-mV)** | **Stationary Phase**  ***E*GSH  SD**  **(-mV)** | | **Exponential Phase**  ***E*GSH  SD**  **(-mV)** | **Stationary Phase**  ***E*GSH  SD**  **(-mV)** | |
|  | WT |  | 349  3 | 335  3 | | 353  3 | 348  3 | | 346  4 | 340  4 | |
| Transcription Factors |  |  |  |  | |  |  | |  |  | |
|  | *yap1* | Basic leucine zipper (bZIP) transcription factor | **320  4** | **322  3** | | **337  4** | 348  3 | | **336  4** | 333  4 | |
|  | *skn7* | Nuclear response regulator and transcription factor | **319  5** | **320  3** | | **340  6** | 341  3 | | **337  5** | 332  5 | |
|  | *msn2* | Transcriptional activator related to Msn4p | 345  3 | 327  4 | | 343  4 | 346  4 | | 340  4 | 333  4 | |
|  | *msn4* | Transcriptional activator related to Msn2p | 347  3 | 328  3 | | 345  4 | 348  3 | | 343  3 | 332  4 | |
| NADPH regeneration |  |  |  |  | |  |  | |  |  | |
|  | *gnd1* | 6-phosphogluconate dehydrogenase | **320 5** | 3355 | | 314 5 | 349 4 | | **343 3** | 330 4 | |
|  | *gnd2* | 6-phosphogluconate dehydrogenase | 335 4 | 3336 | | 355 3 | 340 5 | | 339 5 | **325 5** | |
|  | *sol3* | 6-phosphogluconolactonase | 343 5 | 3405 | | 350 6 | 345 3 | | 345 6 | 338 4 | |
|  | *sol4* | 6-phosphogluconolactonase | 339 6 | 3294 | | 349 3 | 344 3 | | 344 4 | 335 5 | |
|  | *rpe1* | D-ribulose-5-phosphate 3-epimerase | 345 4 | **3205** | | **338 5** | 339 4 | | **349 3** | **329 6** | |
|  | *tal1* | Transaldolase | 339  5 | 332  4 | | 350  6 | 314  4 | | 347  4 | 337  3 | |
|  | *tkl1* | Transketolase; similar to *TKL2* | **330  4** | 329  3 | | **336  3** | 319  5 | | **335  6** | 337  4 | |
|  | *idp1* | Mitochondrial NADP+-specific isocitrate dehydrogenase | 345  3 | 327  4 | | **321  4** | 310  4 | | 341  4 | 332  3 | |
|  | *idp2* | Cytosolic NADP+-specific isocitrate dehydrogenase | 349  4 | 329  4 | | 343  3 | 349  4 | | 346  4 | 339  3 | |
|  | *idp3* | Peroxisomal NADP+-dependent isocitrate dehydrogenase | 338  4 | 327  3 | | 345  4 | 347  3 | | 343  3 | 335  4 | |
|  | *pos5* | Mitochondrial NADH kinase | 337  7 | 325  5 | | **319  6** | 315  4 | | 347  4 | 332  3 | |
|  | *ald6* | Cytosolic aldehyde dehydrogenase, | 334  3 | **320  3** | | 331  3 | 342  3 | | 323  3 | 331  3 | |
| Glutathione system |  |  |  |  | |  |  | |  |  | |
|  | *glr1* | Cytosolic and mitochondrial glutathione oxidoreductase, | **275  4** | **272  5** | | **272 4** | **258  5** | | **276 5** | **273  4** | |
|  | *gpx1* | Phospholipid hydroperoxide glutathione peroxidase | 354  5 | 327  3 | | 350  3 | 341  3 | | 347  3 | 338  3 | |
|  | *gpx2* | Phospholipid hydroperoxide glutathione peroxidase | 344  3 | 333  2 | | 343  5 | 344  3 | | 341  4 | 333  4 | |
|  | *gpx3* | Phospholipid hydroperoxide glutathione peroxidase | 344  3 | 329  3 | | 342  3 | 343  4 | | 339  4 | 323  4 | |
|  | *grx1* | Cytoplasmic di-thiol glutaredoxins | 354  5 | 337  3 | | 350  4 | 344  4 | | 347  3 | 340  3 | |
|  | *grx2* | Cytoplasmic di-thiol glutaredoxins | 359  4 | 335  3 | | 344  4 | 357  3 | | 347  4 | 349  3 | |
|  | *grx3* | Nuclear shuttling monothiol glutaredoxins | 344  3 | 331  4 | | 347  6 | 353  3 | | 345  4 | 346  4 | |
|  | *grx4* | Nuclear shuttling monothiol glutaredoxins | 343  3 | 335  4 | | 347  3 | 355  4 | | 344  3 | 348  3 | |
| Thioredoxin system |  |  |  |  | |  |  | |  |  | |
|  | *trr2* | Mitochondrial thioredoxin reductases | 354  5 | 331  3 | | 346  5 | 346  3 | | 344  3 | 342  6 | |
|  | *trx1* | Cytoplasmic thioredoxin | 352  4 | 337  3 | | 342  4 | 343  3 | | 347  3 | 334  3 | |
|  | *trx2* | Cytoplasmic thioredoxin | 350  5 | 333  4 | | 350  5 | 352  4 | | 348  5 | 335  4 | |
|  | *trx3* | Mitochondrial thioredoxin | 352  3 | 332  3 | | 348  3 | 347  3 | | 343  3 | 339  3 | |
|  |  |  |  |  | |  |  | |  |  | |
| Peroxiredoxins | *tsa1* | Cytoplasmic thioredoxin peroxiredoxin | 347  3 | 327  3 | | 343  3 | 342  5 | | 342  3 | 348  5 | |
|  | *tsa2* | Cytoplasmic thioredoxin peroxiredoxin | 351  4 | 333  5 | | 352  4 | 343  3 | | 348  4 | 347  4 | |
|  | *ahp1* | Cytoplasmic thioredoxin peroxiredoxin | 352  4 | 329  4 | | 350  4 | 345  4 | | 346  4 | 342  6 | |
|  | *dot5* | Nuclear thiol peroxidase | 348  3 | 335  3 | | 342  5 | 352  4 | | 343  3 | 337  4 | |
|  | *prx1* | Mitochondrial peroxiredoxin | 347 4 | 330 5 | | 339 3 | 342 4 | | 345  5 | 340 6 | |
| Antioxidant function |  |  |  |  | |  |  | |  |  | |
|  | *ctt1* | Cytosolic catalase T | 350  4 | 322  4 | | 350  4 | 346  3 | | 348  5 | 342  6 | |
|  | *cta1* | Peroxisomal catalase A | 349  4 | 329  3 | | 350  4 | 348  4 | | 348  3 | 344  6 | |
|  | *sod1* | Cytosolic copper-zinc superoxide dismutase | 333  6 | 334  3 | | 345  6 | 342  3 | | **316  4** | **312  3** | |
|  | *sod2* | Mitochondrial matrix manganese superoxide dismutase | 346 5 | 332 5 | | 340 4 | **328 5** | | 347 5 | 337 6 | |
|  | *ccp1* | Mitochondrial cytochrome-c peroxidase | 342 5 | 335 6 | | **326 6** | **338 4** | | 345 4 | 334 4 | |
